# Supplementary material for: Characterization of Triterpene Saponin Glycyrrhizin Transport by Glycyrrhiza glabra
Source: MDPI journal article supplement (doi:10.3390/plants11091250), 2022-05-05
Supplement: s1 [file s1]

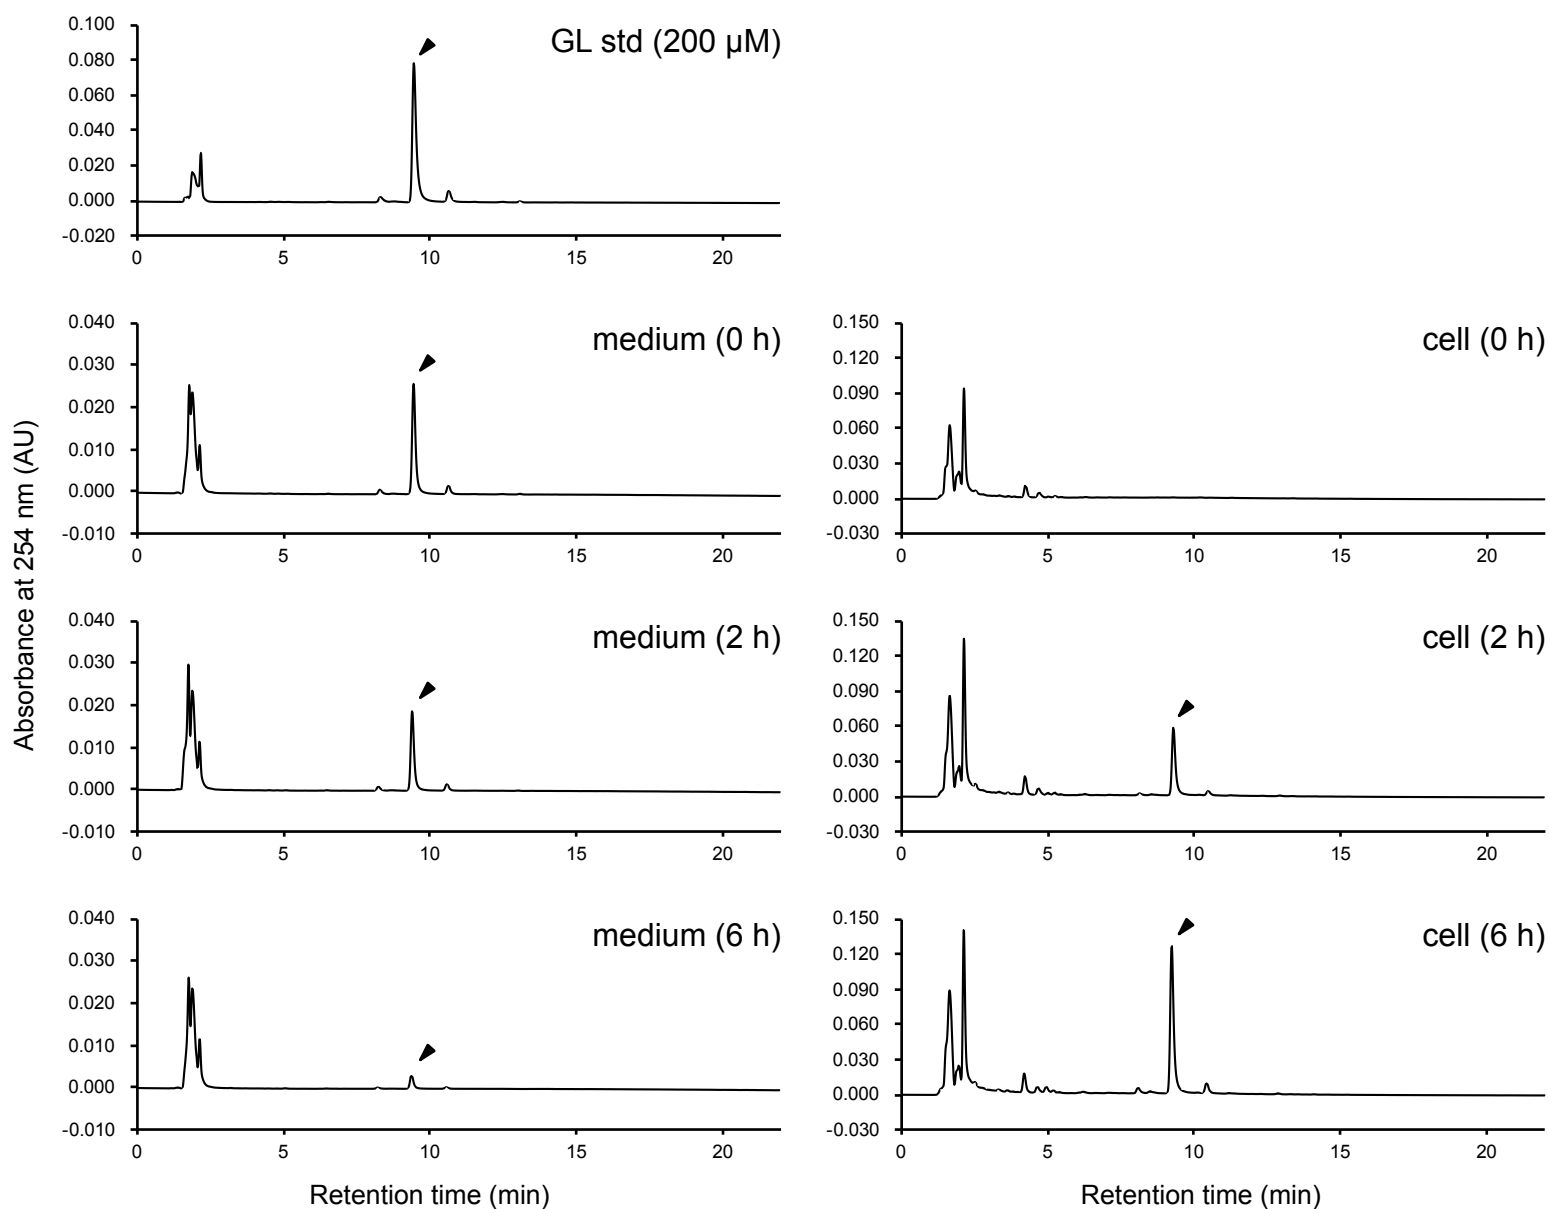

Figure S1. HPLC chromatogram of GL in the cultured medium and cultured cells of *G. glabra*. GL was added to the cultured cells at a concentration of 100  $\mu$ M. The culture medium and cell extracts were subjected to HPLC analysis.
